# Supplementary material for: Plasma membrane damage limits replicative lifespan in yeast and induces premature senescence in human fibroblasts
Source: PubMed Central journal article supplement (PMC10950784; doi:10.1038/s43587-024-00575-6), 2024-02-22

# Unprocessed source data of western Blots

## Figure 3e

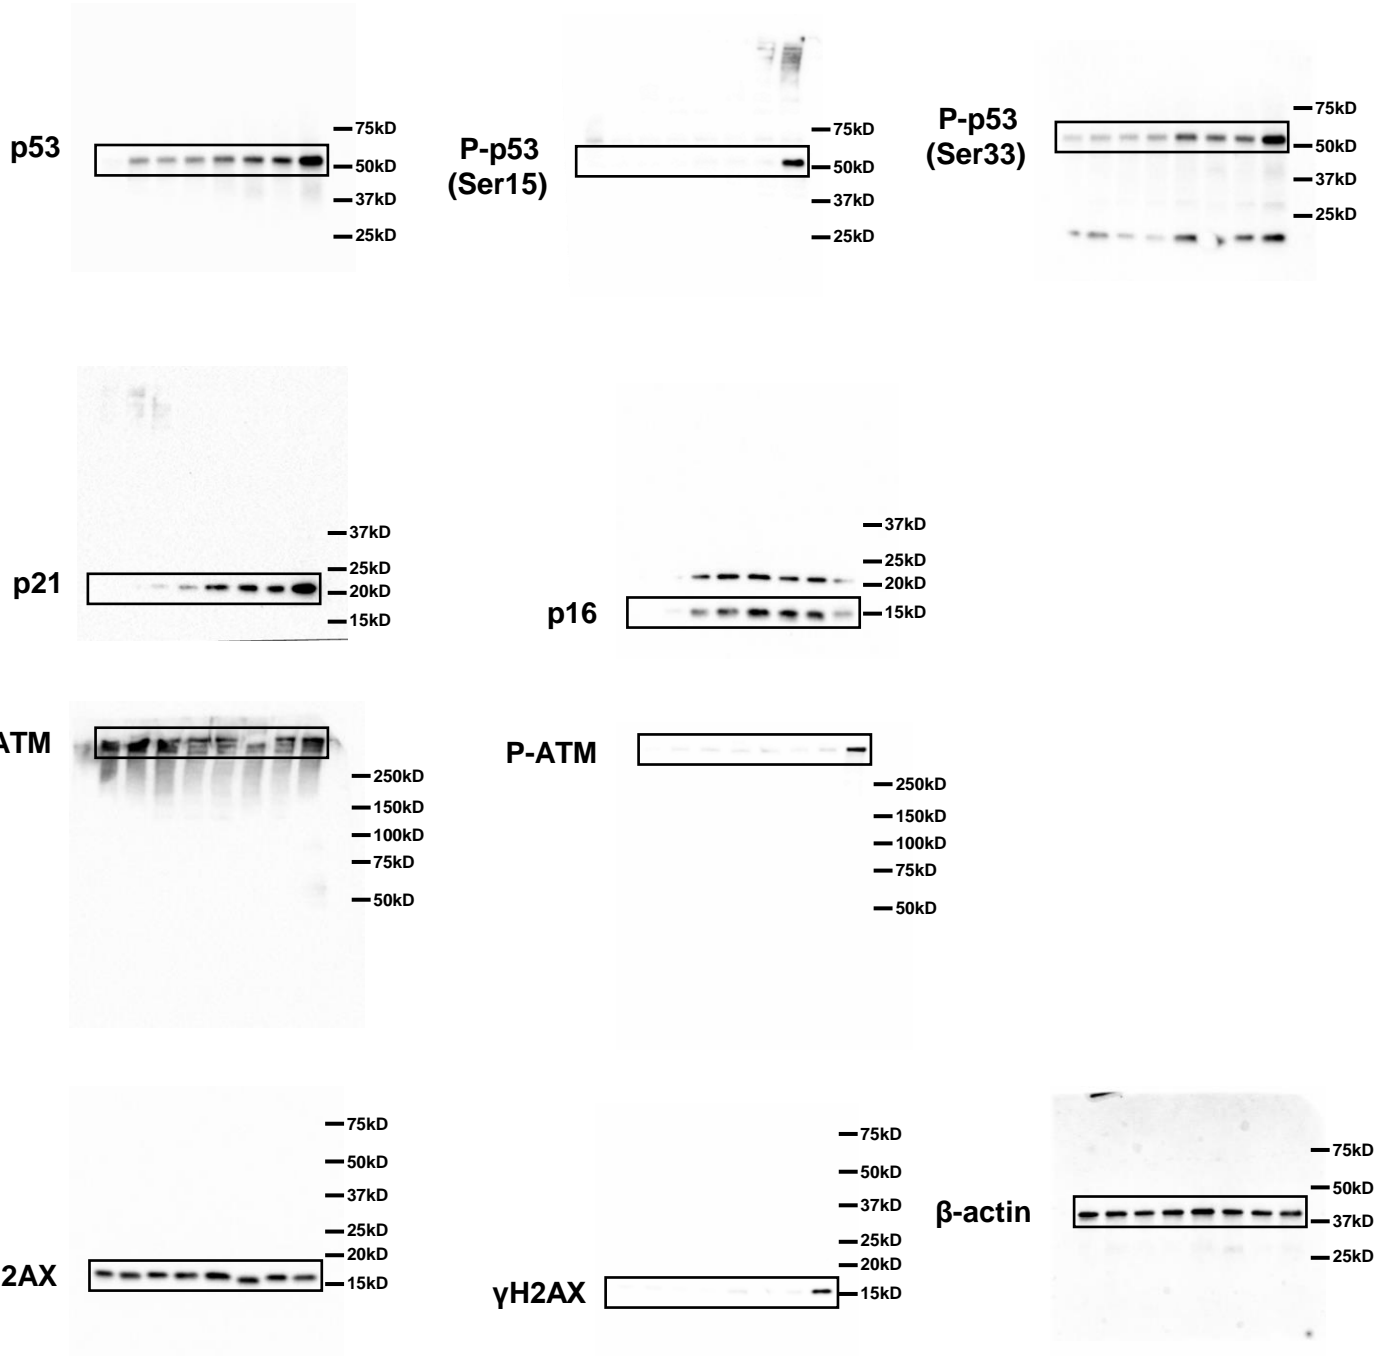

**Figure 3i**

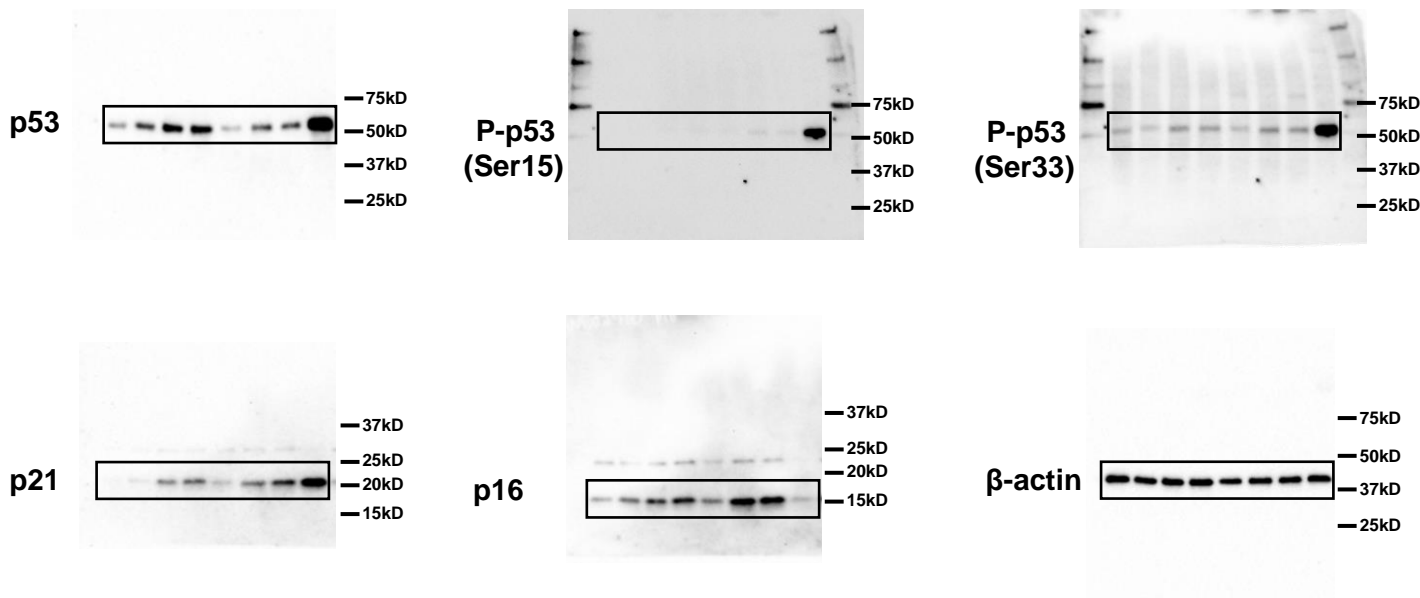

**Figure 4c**

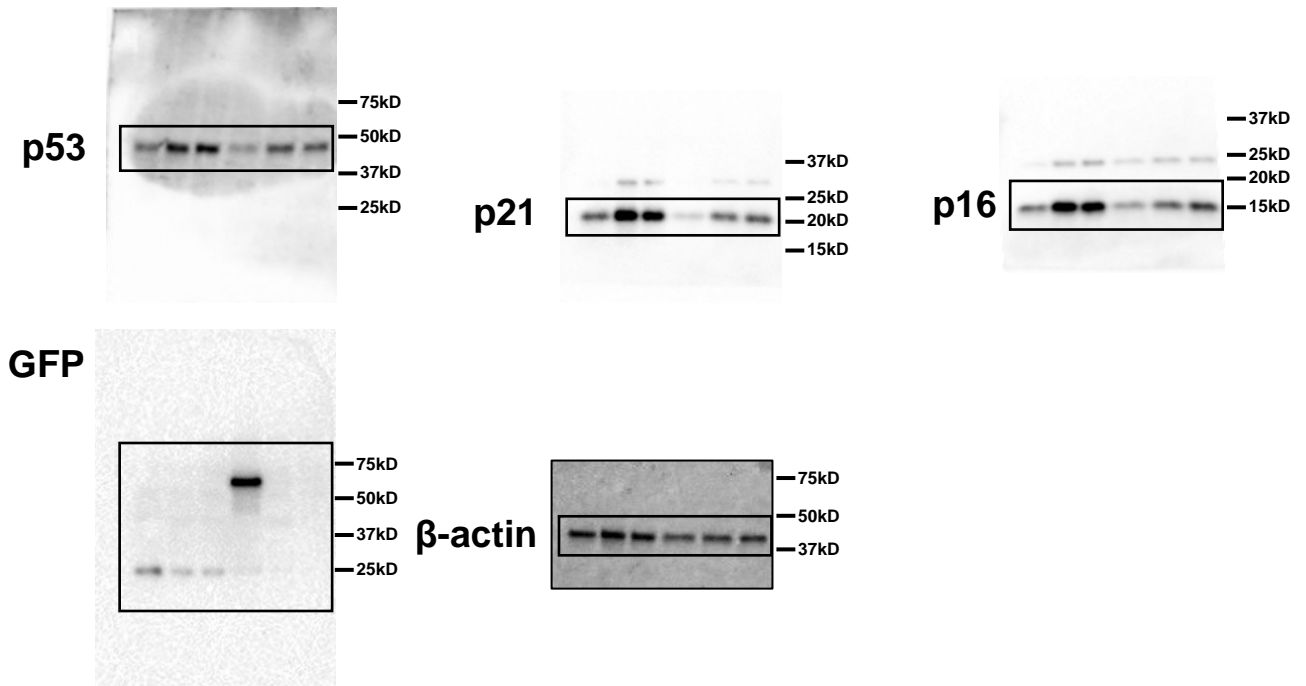

**Figure 5b**

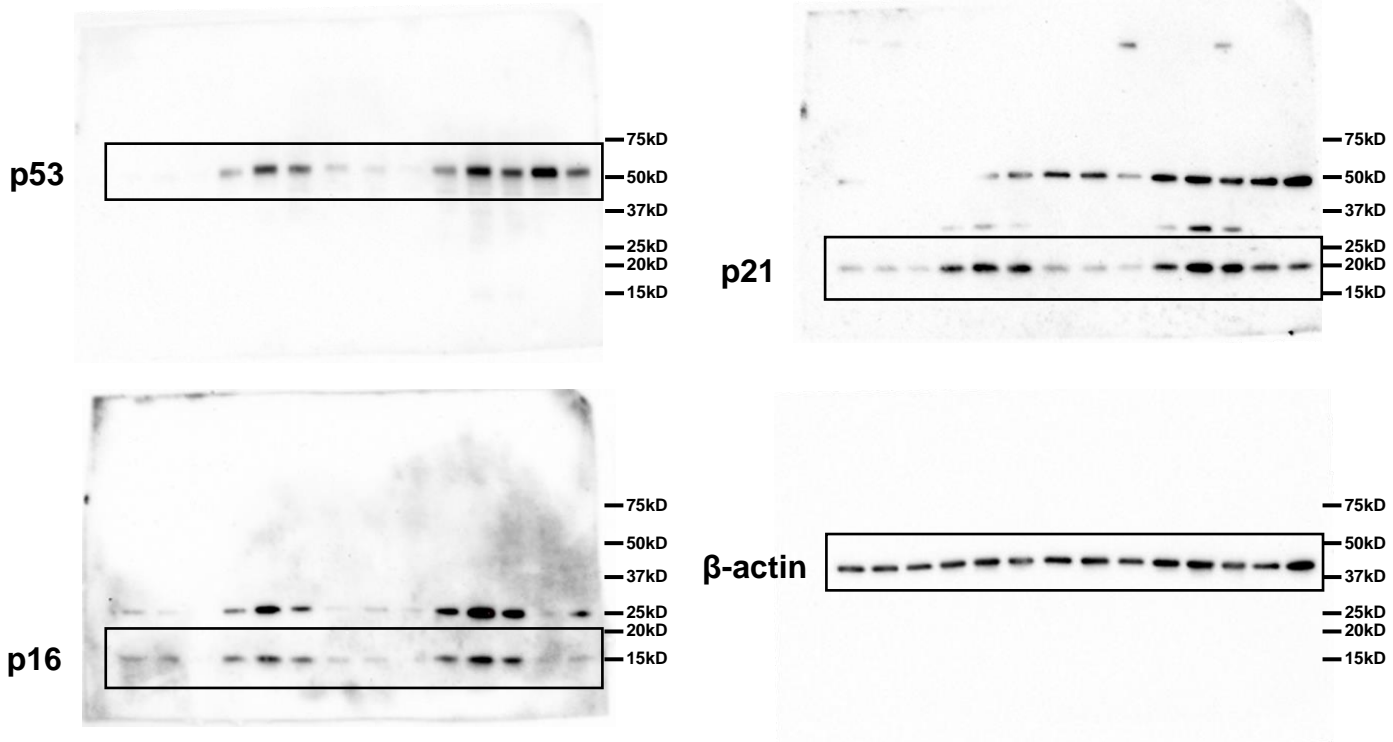

**Figure 5c**

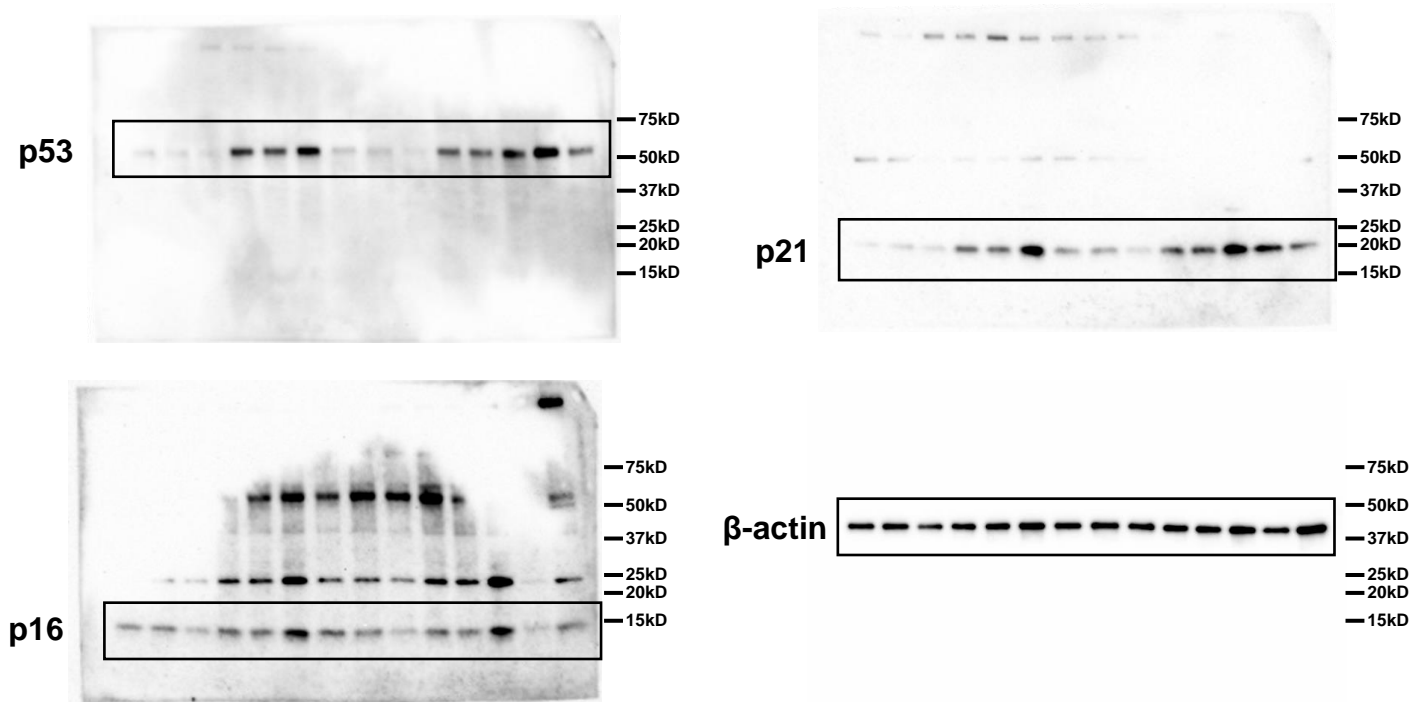

**Figure 5d**

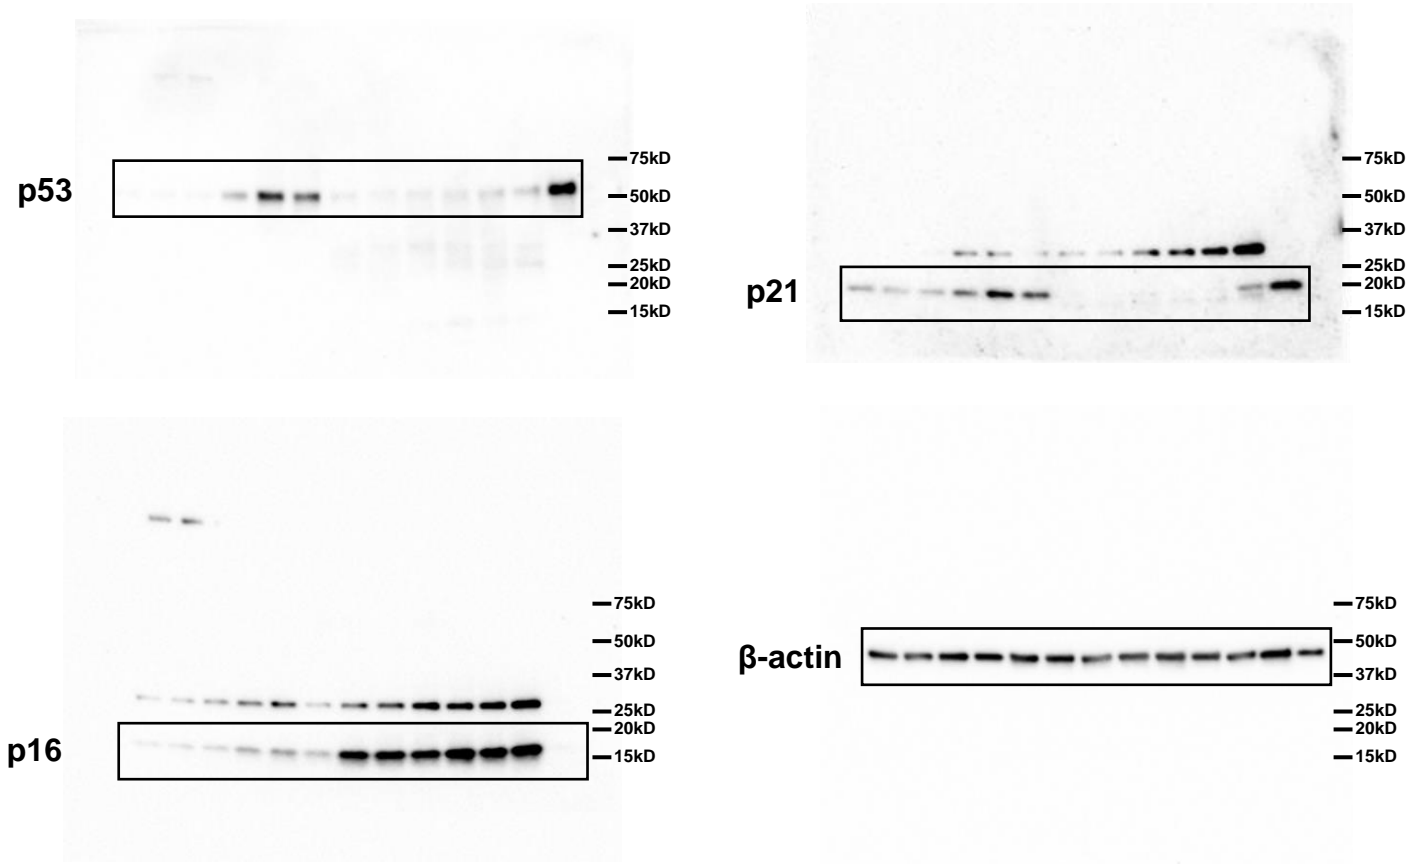

**Figure 6c**

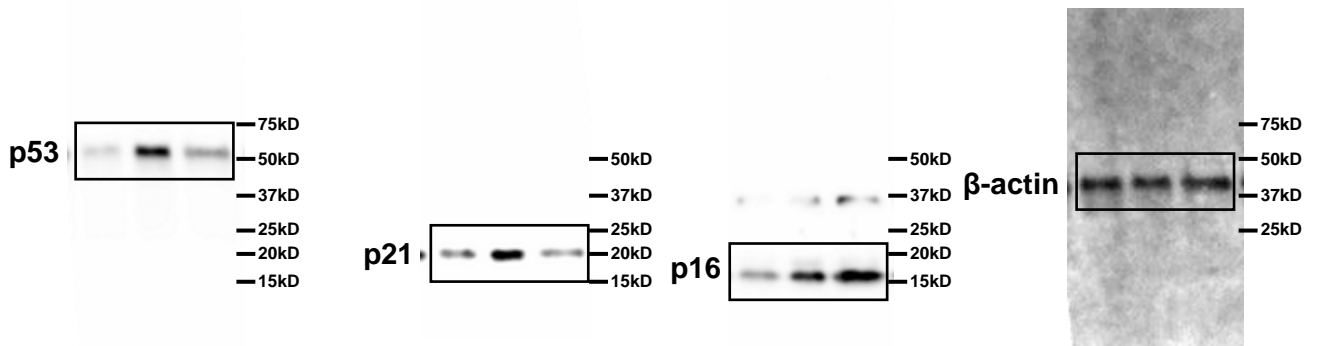

**Figure 6f**

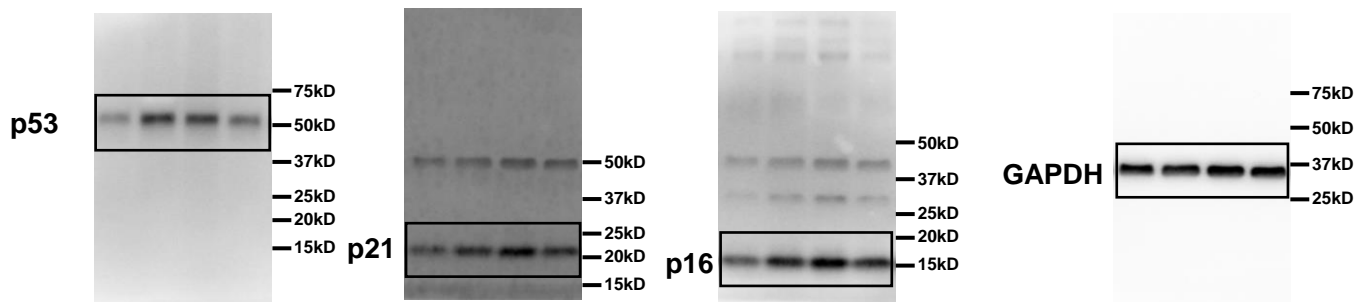

# Extended data Figure 6e

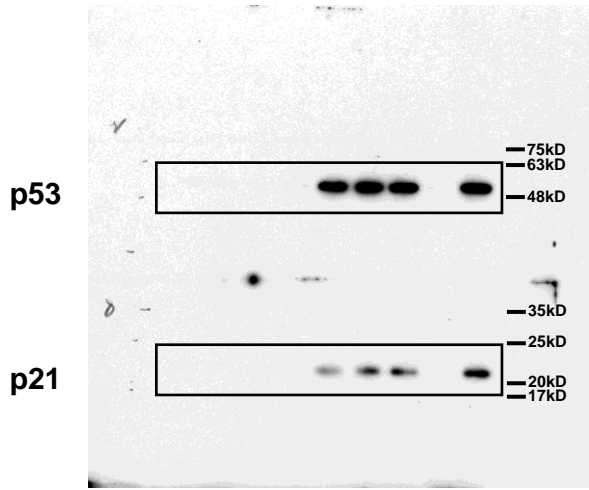

**P-ATM**

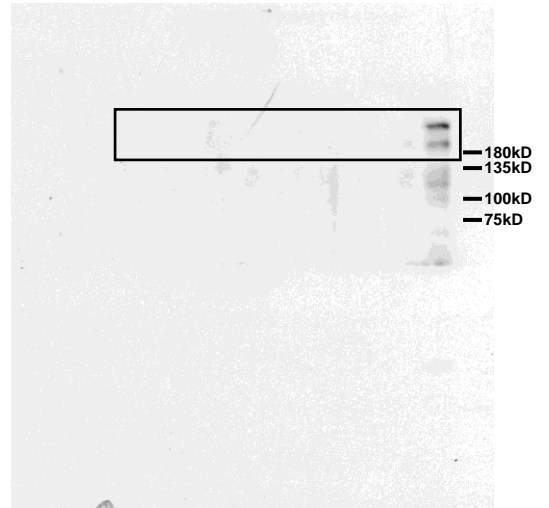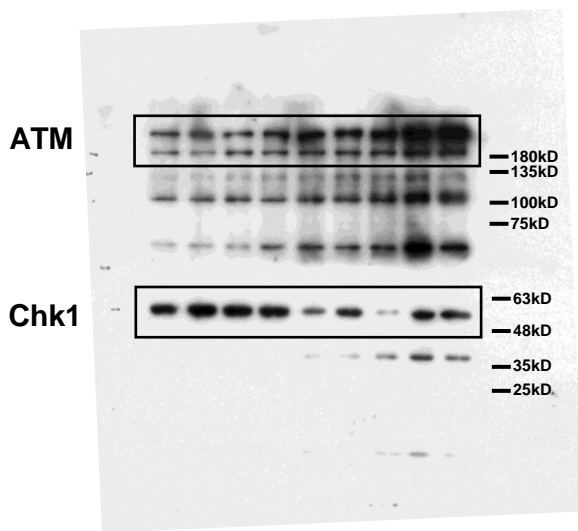

**P-Chk1**

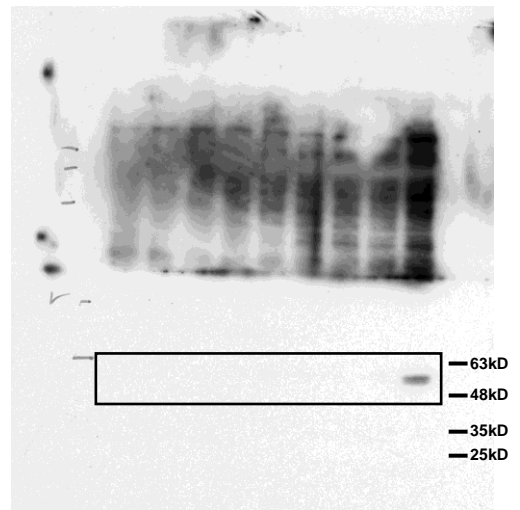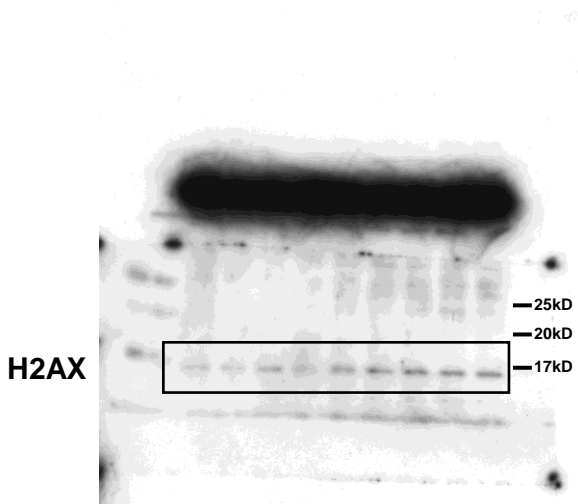

**$\gamma$ H2AX**

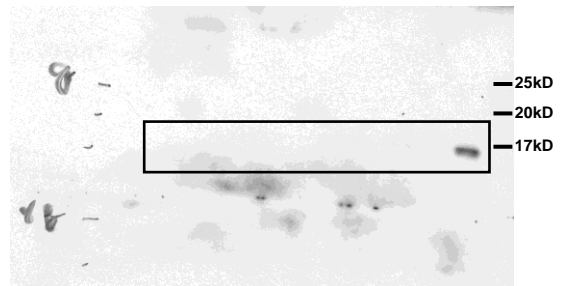

**$\beta$ -actin**

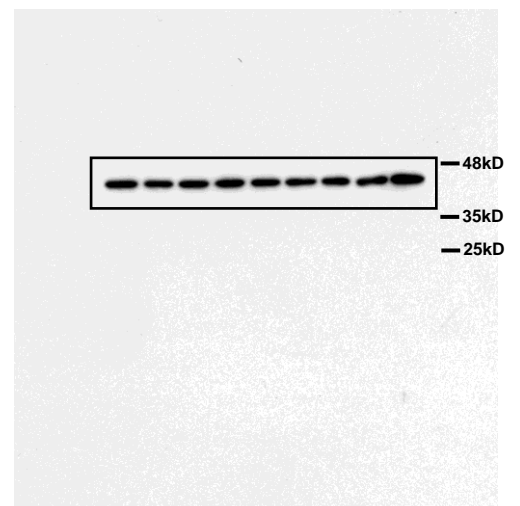

# Extended data Figure 6f

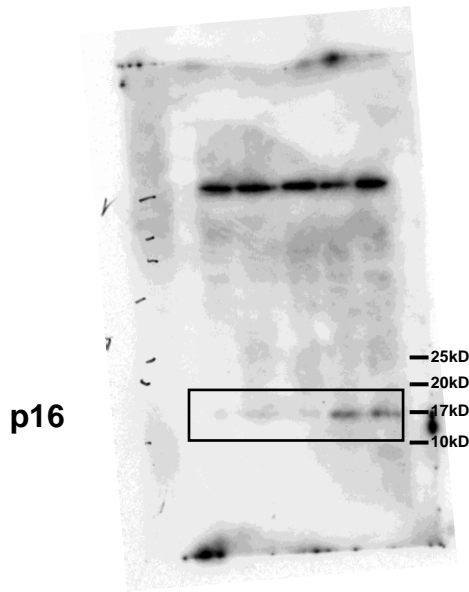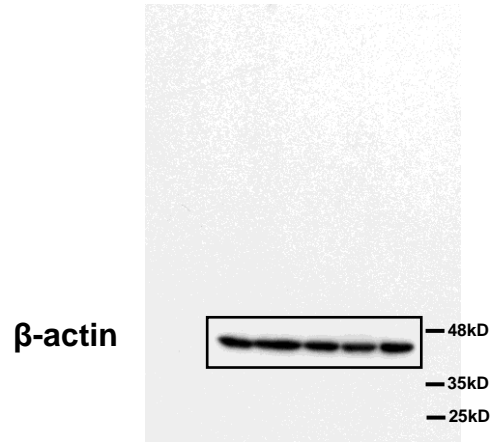

# Extended data Figure 7b

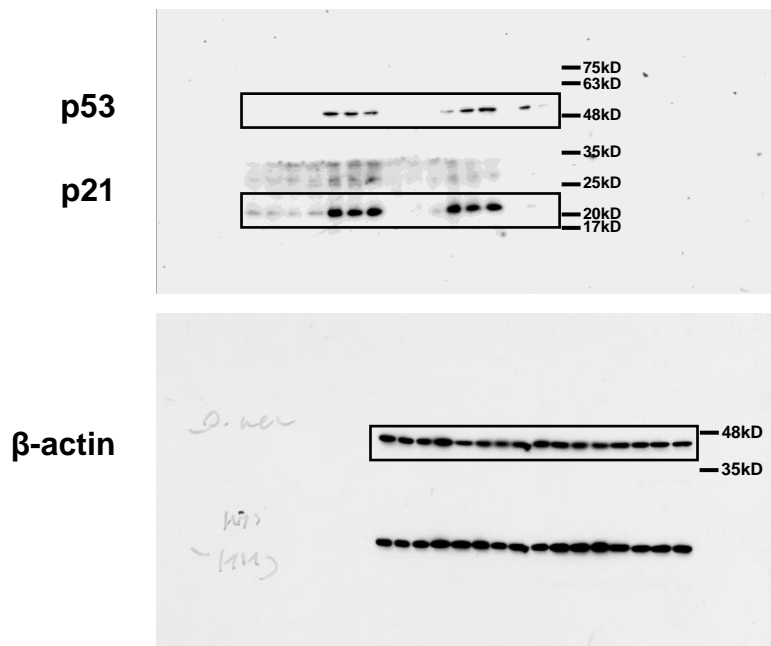

# Extended data Figure 7c

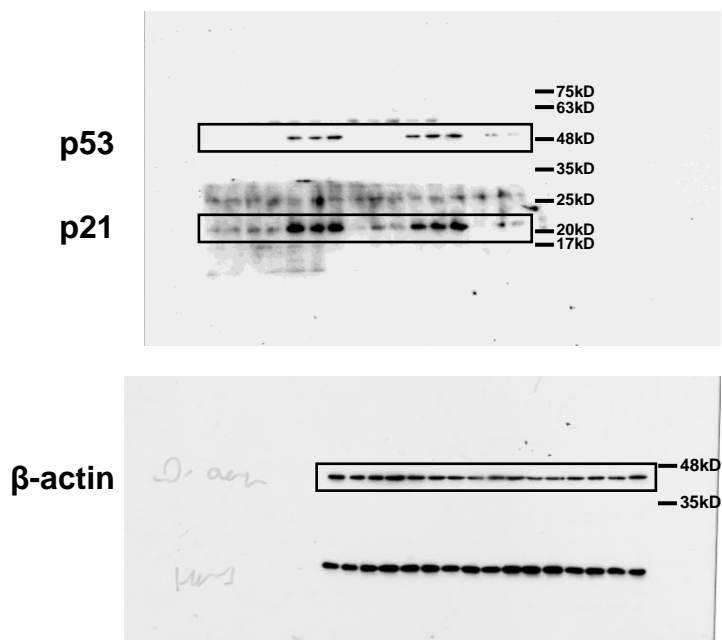

# Extended data Figure 7d

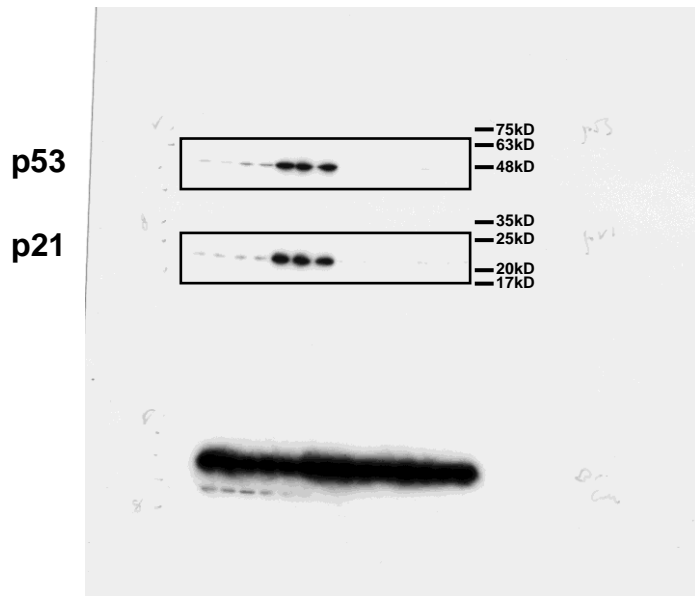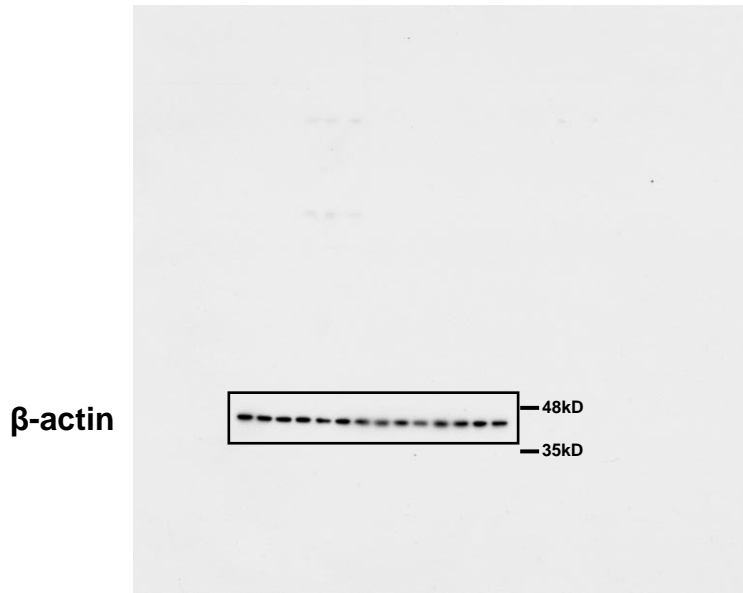



# Extended data Figure 8g

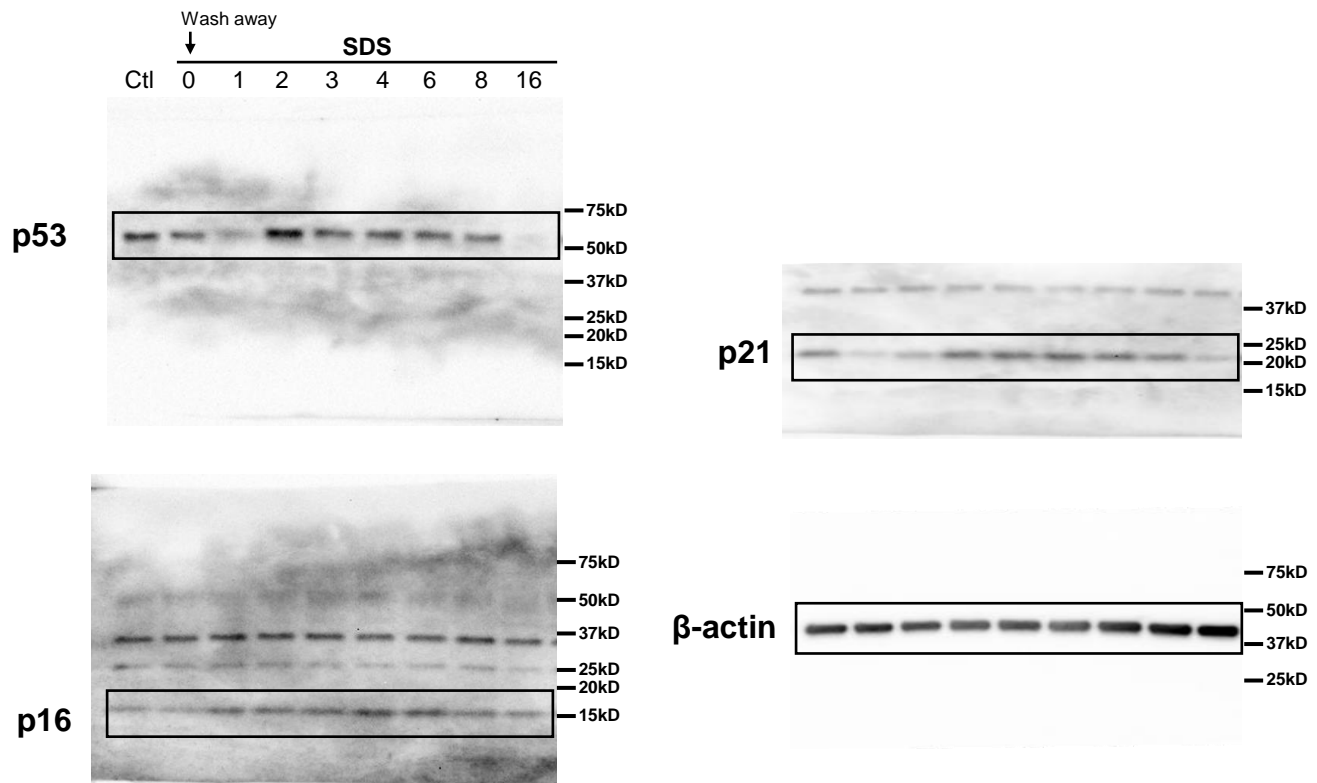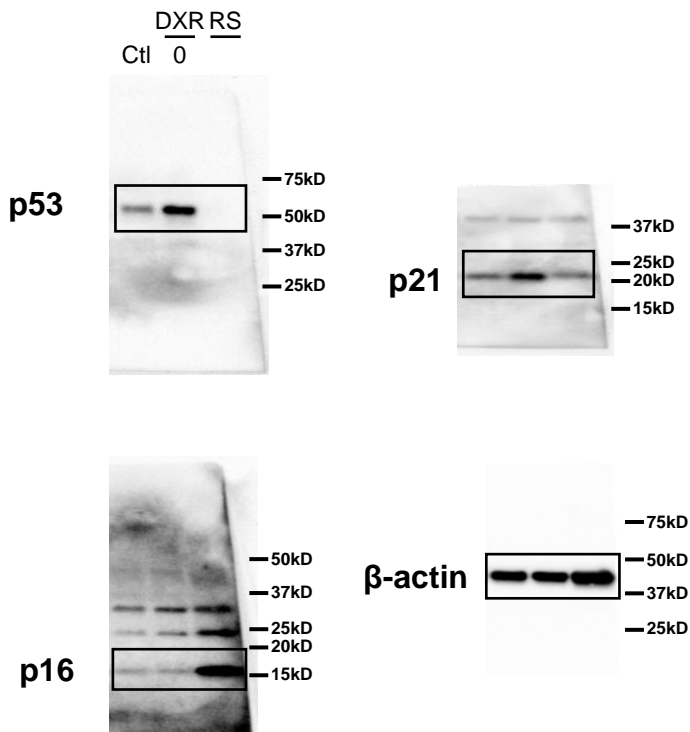

# Extended data Figure 8g

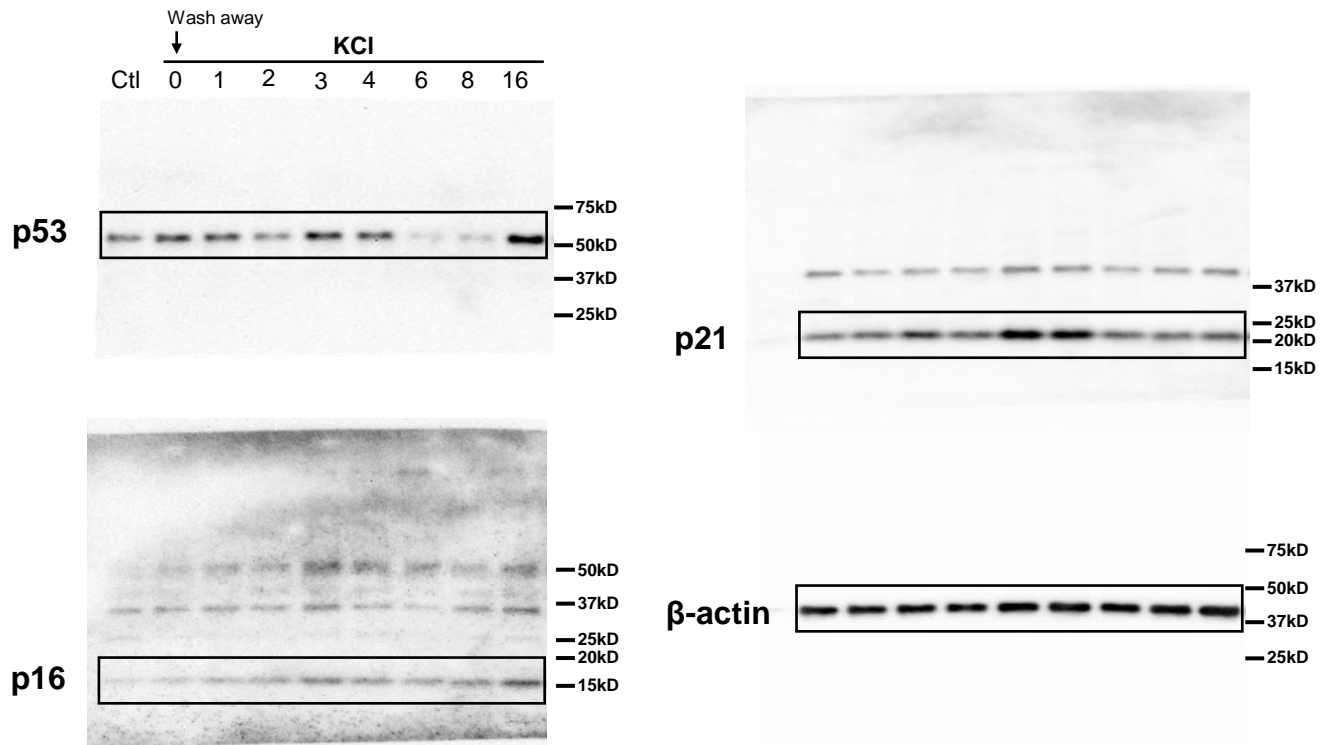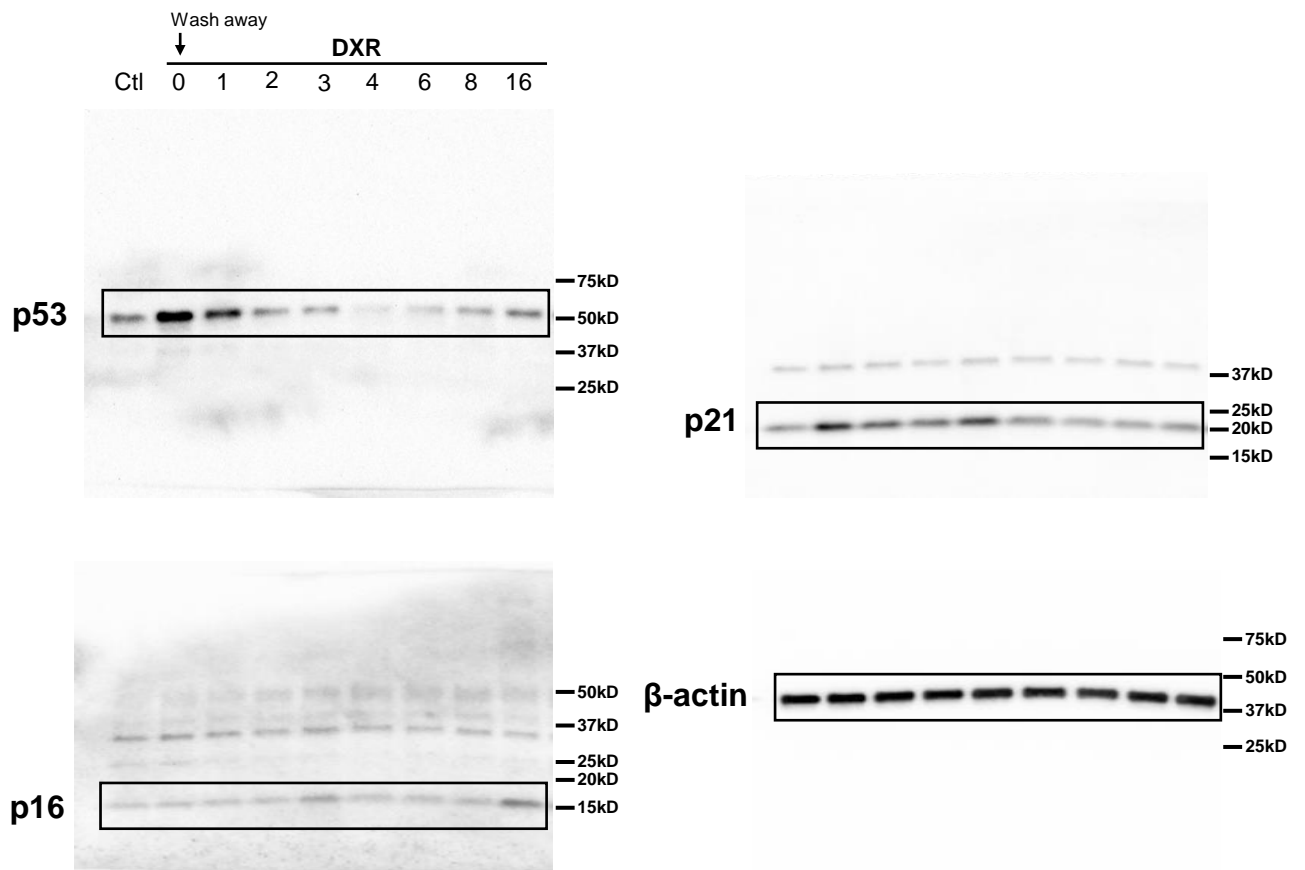

Supplement: 43587_2024_575_MOESM10_ESM.pdf [file 43587_2024_575_MOESM10_ESM.pdf]
