# Supplementary material for: Plasma membrane damage limits replicative lifespan in yeast and induces premature senescence in human fibroblasts
Source: PubMed Central journal article supplement (PMC10950784; doi:10.1038/s43587-024-00575-6), 2024-02-22
Supplement: 43587_2024_575_MOESM1_ESM.pdf [file 43587_2024_575_MOESM1_ESM.pdf]

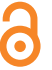

---

# Plasma membrane damage limits replicative lifespan in yeast and induces premature senescence in human fibroblasts

---

In the format provided by the authors and unedited

## Supplementary Text

To characterize the screening hits, the budding yeast gene deletion mutants that failed to grow on SDS-containing YPD plates, we examined cell viability after SDS treatment. We found that ESCRT mutants (*did4* $\Delta$ , *snf7* $\Delta$ , *stp22* $\Delta$ , *vps20* $\Delta$ , *vps25* $\Delta$ , *vps36* $\Delta$ , and *vps24* $\Delta$ ) survived in the course of the two-hour SDS treatment, whereas V-ATPase mutants (*vma21* $\Delta$ , *vph2* $\Delta$ , *vma5* $\Delta$ , *vma1* $\Delta$ , and *vma13* $\Delta$ ) lost their viability within 30 min (Extended Data Fig. 4a-d).

V-ATPase produces a proton gradient across the vacuolar membrane, enabling  $\text{Ca}^{2+}$  uptake into the vacuole; the mutants lacking functional V-ATPase show high cytoplasmic  $\text{Ca}^{2+}$  levels<sup>65</sup>. Since  $\text{Ca}^{2+}$  influx at the damage site is essential for membrane resealing in higher eukaryotes<sup>6,7</sup>, SDS sensitivity in V-ATPase mutants may be explained by the high cytosolic  $\text{Ca}^{2+}$  concentration in V-ATPase mutants, preventing membrane resealing. Indeed, in our DAPI penetration assay (30 min incubation in YPD+SDS and quick wash with YPD, followed by 5 min incubation with DAPI), V-ATPase mutants (*vma1* $\Delta$  and *vma13* $\Delta$ ) showed high DAPI-positivity (*vma1* $\Delta$ :  $72.2 \pm 14.6$ , *vma13* $\Delta$ :  $63.0 \pm 8.6$ ; Extended Data Fig. 4e) analogous to SDS and EGTA-treated wild type (Fig. 1a and b). These results raise a possibility that  $\text{Ca}^{2+}$  influx-dependent membrane resealing is impaired in V-ATPase mutants.

To test the possibility that  $\text{Ca}^{2+}$  homeostasis is defective in V-ATPase mutants, we monitored subcellular localization of Crz1-GFP, a  $\text{Ca}^{2+}$ -responsive transcription factor that enters nucleus after various stimuli<sup>66</sup>. After the laser-induced cell wall and plasma membrane damage, Crz1-GFP entered the nucleus within 30 sec (Extended Data Fig. 4f and g). In a V-ATPase mutant *vma1* $\Delta$ , even before the laser damage Crz1-GFP signals at the nucleus was comparable to the peak levels of control cells and did not increase after the laser damage. These results support our interpretation that  $\text{Ca}^{2+}$ -influx detection is

impaired in *vma1Δ*.

Since *cho1Δ*, defective in phospholipid phosphatidylserine (PS) synthesis, was a screening hit, we examined whether PS is involved in plasma membrane/cell wall repair processes after the laser damage. Wild type yeast cells harboring a plasmid of Lact-C2-GFP, a PS marker, were subjected to the laser damage assay. We found that Lact-C2-GFP signal gradually accumulated at the damage site and peaked after ~13 min (Extended Data Fig. 4h and i), consistent with the idea that PS is involved in the plasma membrane/cell wall repair processes.

We next focused on *pep3Δ* and *vps34Δ*. These mutants shared three common phenotypes: 1) the cell viability did not decrease after 2hr SDS treatment (Extended Data Fig. 4d), 2) the cells did not show DAPI penetration after 30 min SDS treatment (Extended Data Fig. 4e), and 3) in the laser damage experiment, a major repair protein Pkc1-GFP failed to be retained at the laser damage site (Extended Data Fig. 4j and k). These results suggest that Pep3 and Vps34 are required for the retention of Pkc1 but not for plasma membrane resealing immediately after the damage or initial Pkc1 recruitment to the damage site.

In summary, here we revealed four cellular processes during plasma membrane/cell wall damage response in budding yeast: 1) V-ATPase-dependent prevention of immediate cell death, 2) Crz1 nuclear import, 3) PS recruitment to the damage site, and 4) Pep3 and Vps34-dependent retention of Pkc1 (Supplementary Fig. 2).

### Supplementary Reference

- 65 Ohya, Y. *et al.* Calcium-sensitive cls mutants of *Saccharomyces cerevisiae* showing a Pet-phenotype are ascribable to defects of vacuolar membrane H (+)-ATPase activity. *Journal of Biological Chemistry* **266**, 13971-13977 (1991).
- 66 Stathopoulos-Gerontides, A., Guo, J. J. & Cyert, M. S. Yeast calcineurin regulates nuclear localization of the Crz1p transcription factor through dephosphorylation. *Genes & development* **13**, 798-803 (1999).

## Supplemental Figures

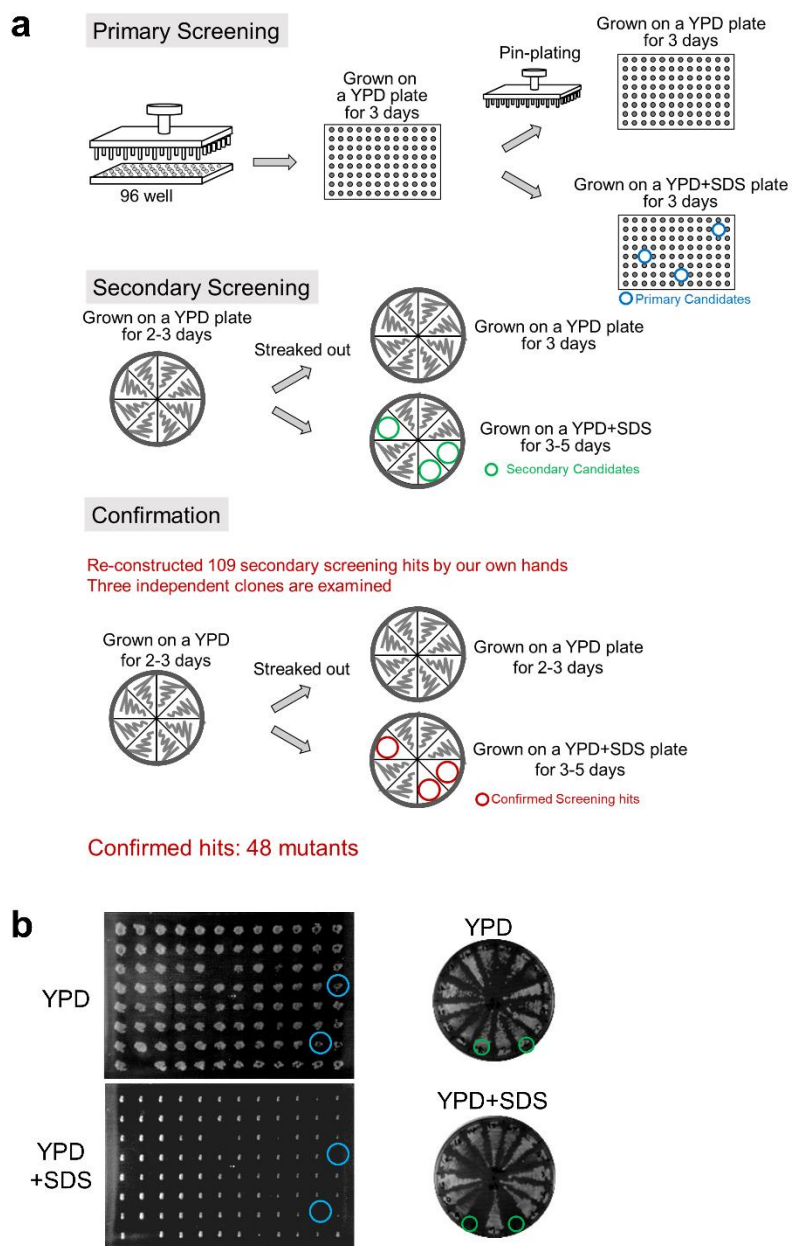

### Supplementary Fig. 1. Summary of the screening method

**(a)** Schematic drawing of the screening method. Blue circle, primary hits (249 mutants); green circle, secondary hits (109 mutants); red circle, confirmed hits (48 mutants). **(b)** Example images of the plates used in the screening.

## Cellular Responses after the Laser Damage

Before damage → 30 sec after damage → 10 min after damage

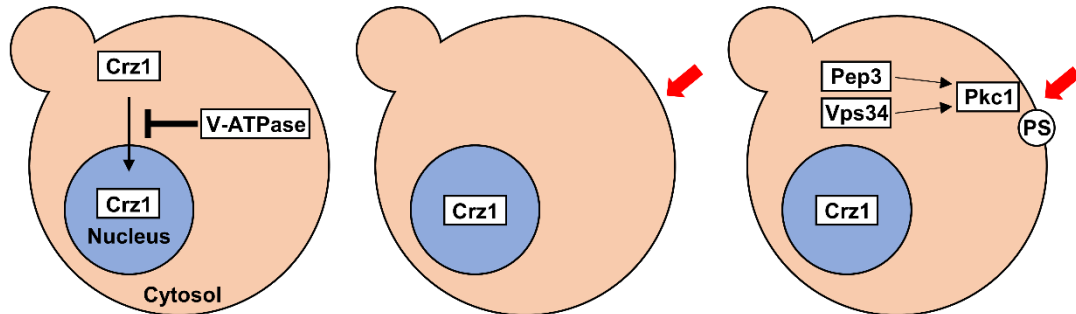

### **Supplementary Fig. 2. Summary of laser damage responses in budding yeast**

Cellular responses after laser damage. Red arrows indicate the laser damage site.

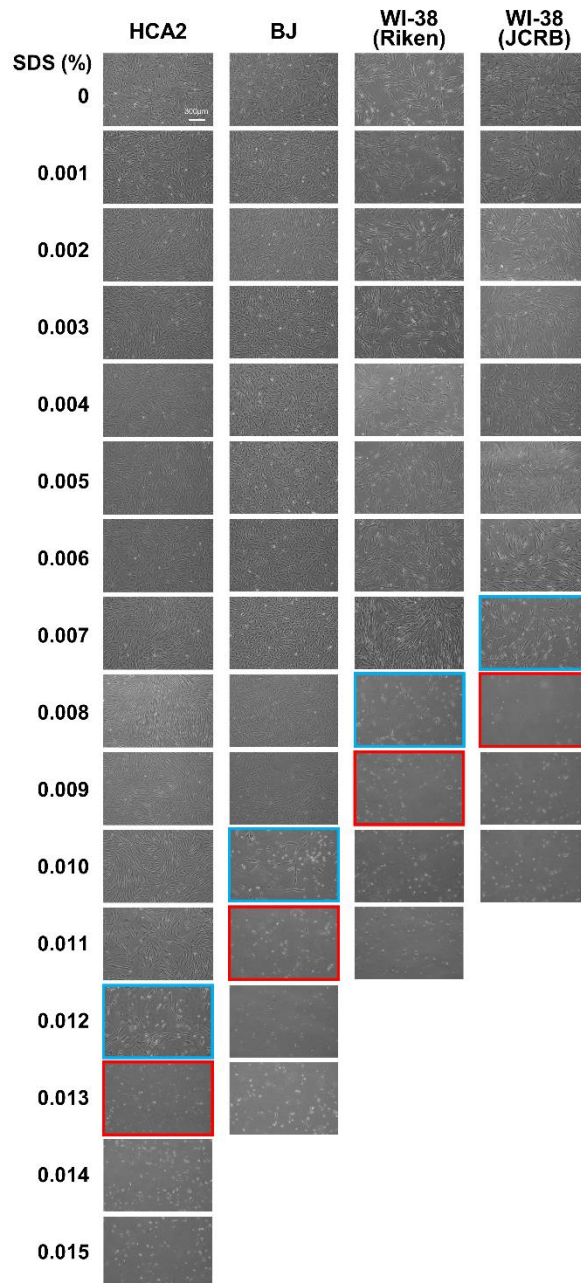

**Supplementary Fig. 3. Identification of the optimal SDS concentration for different types of human normal fibroblasts**

The four different types of human normal fibroblasts (HCA2, BJ, WI-38 distributed from RIKEN, and WI-38 from JCRB: Japanese Collection of Research Bioresources Cell Bank) were cultured with the different SDS concentrations. The blue boxes indicate sub-lethal SDS concentrations at day 5, and the red boxes are lethal SDS concentrations, which depend on the cell type and distributes. Based on these results, we used the upper limit of

concentration that does not induce cell death after 24 hours of SDS treatment. This experiment was independently repeated three times with similar results.



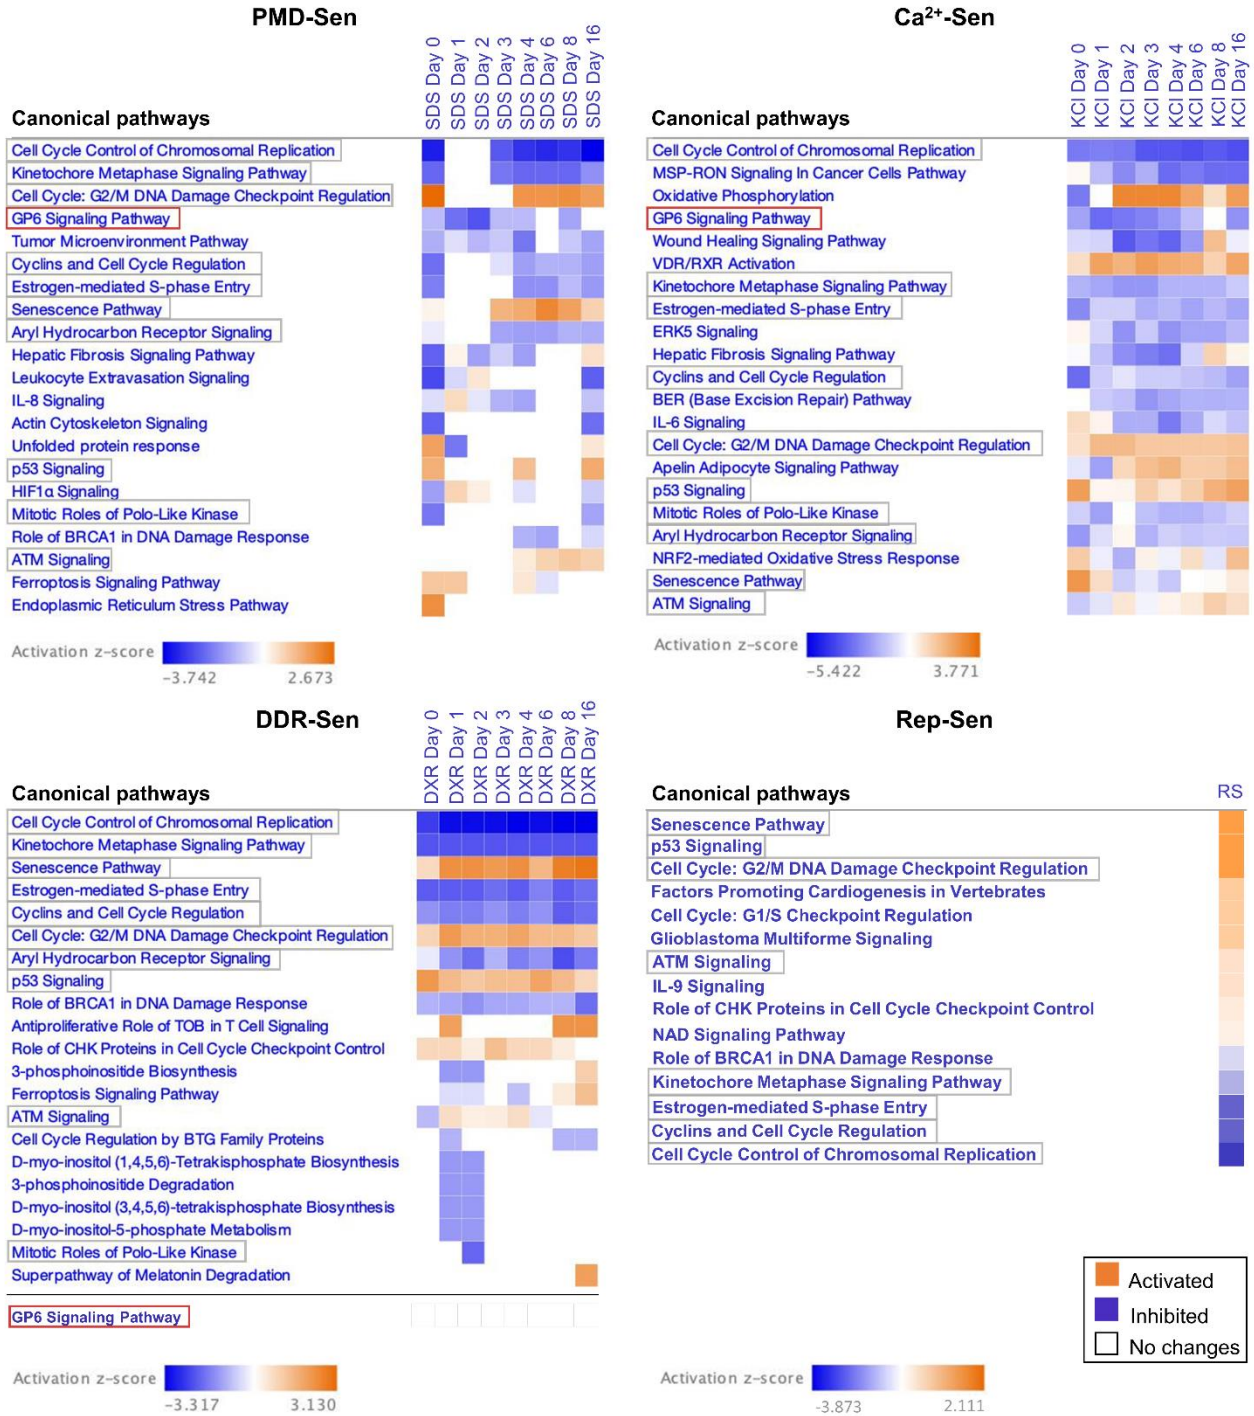

**Common pathways in RS, PMD-Sen, Ca<sup>2+</sup>-Sen and DDR-Sen**

- 1) Cell cycle control of chromosomal replication
- 2) Kinetochores metaphase signaling pathway
- 3) Cell cycle: G2/M DNA damage checkpoint regulation
- 4) Estrogen-mediated S-phase entry
- 5) Cyclins and cell cycle regulation
- 6) Senescence pathway
- 7) p53 signaling
- 8) ATM signaling

**Common pathway in PMD-Sen and Ca<sup>2+</sup>-Sen**

- 1) GP6 signaling pathway

**Supplementary Fig. 4. Top canonical pathways in PMD-Sen, Ca<sup>2+</sup>-Sen, DDR-Sen, and Rep-Sen**

Heat maps generated by IPA comparison analysis show top canonical pathways affected by the differentially expressed mRNAs in PMD-Sen, Ca<sup>2+</sup>-Sen, DDR-Sen, and Rep-Sen. Orange and blue indicate positive and negative activation z-scores, respectively, while white indicates no significant activation z-scores. Related to Figure 7a.

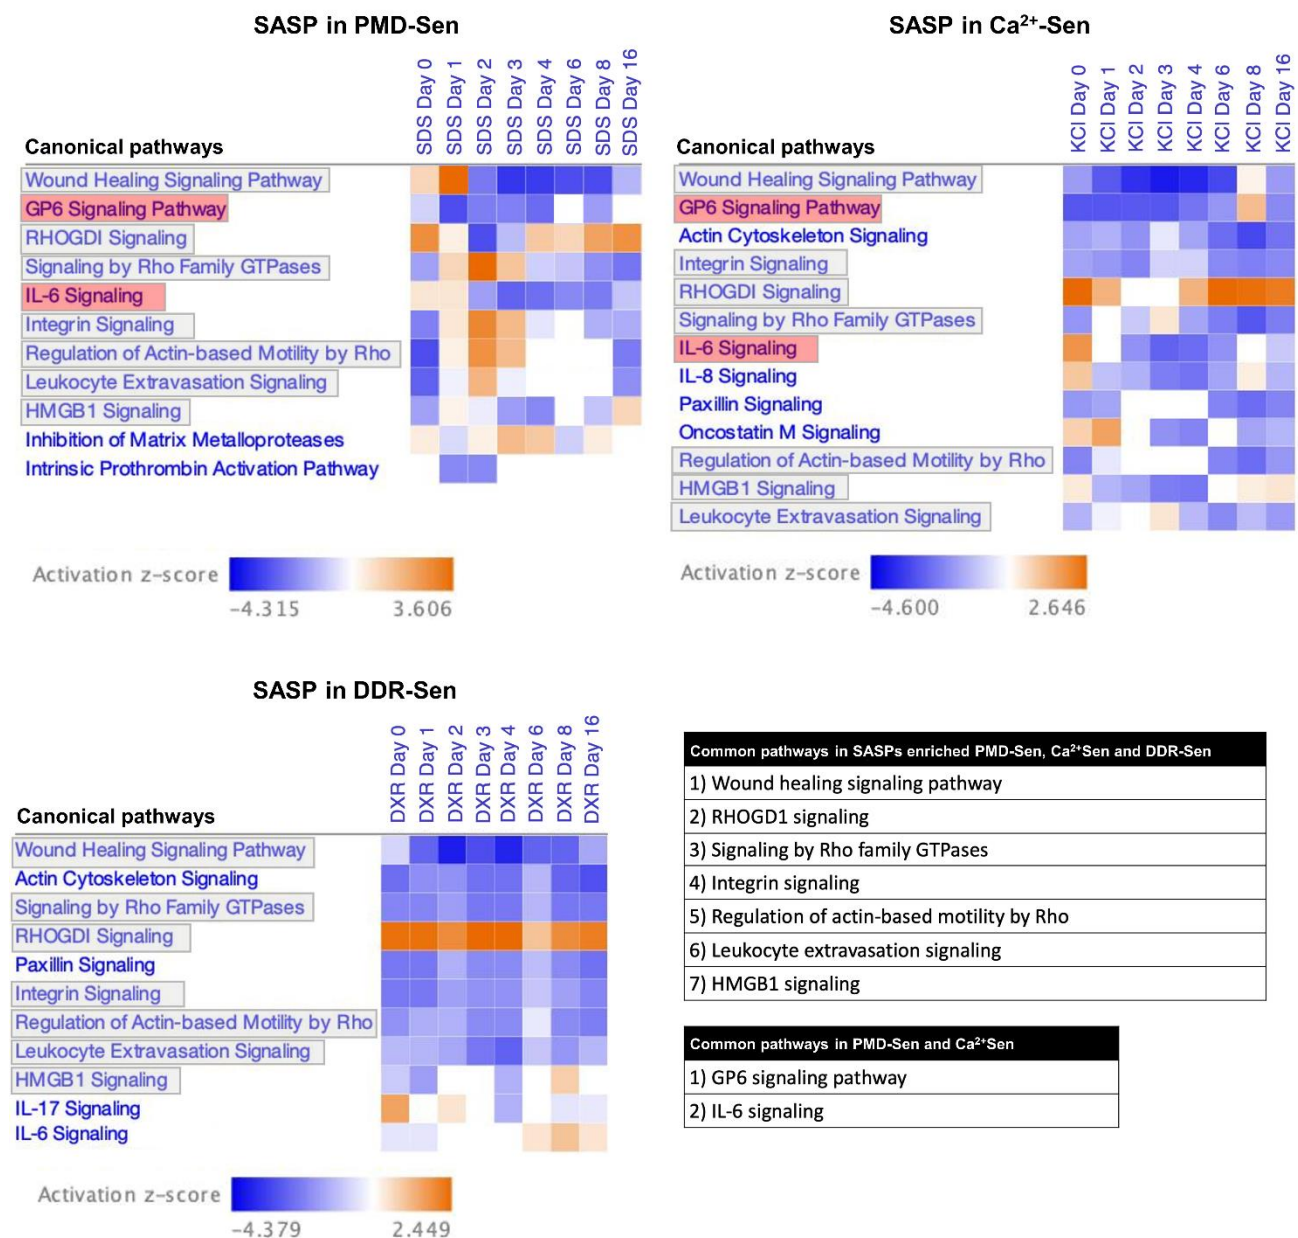

**Supplementary Fig. 5. Top canonical pathways associated with SASP factors in PMD-Sen, Ca<sup>2+</sup>-Sen, DDR-Sen**

Heat maps generated by IPA comparison analysis show top canonical pathways affected by the SASP factors differentially expressed in PMD-Sen, Ca<sup>2+</sup>-Sen, and DDR-Sen. Orange and blue indicate positive and negative activation z-scores, respectively, while white indicates no significant activation z-scores. Related to Figure 7b.

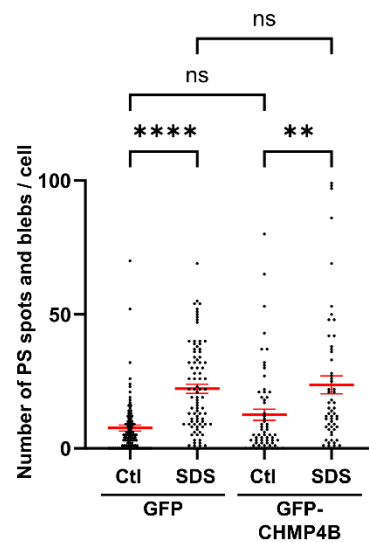

**Supplementary Fig. 6. CHMP4B overexpression does not suppress the formation of PS externalizing spots/blebs after SDS treatment**

WI-38 cells were treated as in Fig. 4. PS externalizing spots/blebs were stained with Annexin V-Alexa Fluor 674 before and after SDS treatment for 1 hour. Cell number: GFP-expressed untreated cells (n=91), GFP-expressed SDS-treated cells (n=89), GFP-CHMP4B-expressed untreated cells (n=61), GFP-CHMP4B-expressed SDS-treated cells (n=57). *p* value: \*\*<0.01, \*\*\*\*<0.001 by One-way ANNOVA, Dunnett. Exact *p* value: Ctl vs. SDS in Control cells: <0.0001, Ctl vs. SDS in CHMP4B-expressed cells: 0.0023, Ctl in Control cells vs. Ctl in CHMP4B-expressed cells: 0.2981, SDS in Control cells vs. SDS in CHMP4B-expressed cells: 0.9571. Mean(SD).

## Supplementary Table

| Analysis Type:                                                                   | PANTHER Overrepresentation Test (Released 20200728)                  |        |          |            |                 |             |          |
|----------------------------------------------------------------------------------|----------------------------------------------------------------------|--------|----------|------------|-----------------|-------------|----------|
| Annotation Version and Release Date:                                             | GO Ontology database DOI: 10.5281/zenodo.4081749 Released 2020-10-09 |        |          |            |                 |             |          |
| Analyzed List:                                                                   | Screening Hits (Saccharomyces cerevisiae)                            |        |          |            |                 |             |          |
| Reference List:                                                                  | Saccharomyces cerevisiae (all genes in database)                     |        |          |            |                 |             |          |
| Test Type:                                                                       | FISHER                                                               |        |          |            |                 |             |          |
| Correction:                                                                      | FDR                                                                  |        |          |            |                 |             |          |
| GO biological process complete                                                   | Saccharomyces cerevisiae - REFLIST (6049)                            | Number | expected | over/under | fold Enrichment | raw P-value | FDR      |
| intraluminal vesicle formation (GO:0070676)                                      |                                                                      | 7      | 5        | 0.05 +     | 96.02           | 1.33E-08    | 2.33E-05 |
| chorismate metabolic process (GO:0046417)                                        |                                                                      | 5      | 3        | 0.04 +     | 80.65           | 2.05E-05    | 3.37E-03 |
| ATP export (GO:1904669)                                                          |                                                                      | 17     | 7        | 0.13 +     | 55.35           | 2.32E-10    | 6.09E-07 |
| endosome organization (GO:0007032)                                               |                                                                      | 21     | 6        | 0.16 +     | 38.41           | 3.03E-08    | 3.98E-05 |
| aromatic amino acid family biosynthetic process (GO:0009073)                     |                                                                      | 24     | 5        | 0.18 +     | 28              | 1.82E-06    | 6.37E-04 |
| reticulophagy (GO:0061709)                                                       |                                                                      | 15     | 3        | 0.11 +     | 26.88           | 2.84E-04    | 3.56E-02 |
| protein retention in Golgi apparatus (GO:0045053)                                |                                                                      | 15     | 3        | 0.11 +     | 26.88           | 2.84E-04    | 3.47E-02 |
| vesicle budding from membrane (GO:0006900)                                       |                                                                      | 25     | 5        | 0.19 +     | 26.88           | 2.17E-06    | 7.13E-04 |
| vacuolar acidification (GO:0007035)                                              |                                                                      | 27     | 5        | 0.2 +      | 24.89           | 3.03E-06    | 8.39E-04 |
| intracellular pH reduction (GO:0051452)                                          |                                                                      | 27     | 5        | 0.2 +      | 24.89           | 3.03E-06    | 7.97E-04 |
| pH reduction (GO:0045851)                                                        |                                                                      | 27     | 5        | 0.2 +      | 24.89           | 3.03E-06    | 7.59E-04 |
| ubiquitin-dependent protein catabolic process via the multivesicular body sortin |                                                                      | 39     | 7        | 0.29 +     | 24.13           | 3.18E-08    | 3.34E-05 |
| ATP transport (GO:0015867)                                                       |                                                                      | 41     | 7        | 0.31 +     | 22.95           | 4.32E-08    | 3.79E-05 |
| purine ribonucleotide transport (GO:0015868)                                     |                                                                      | 43     | 7        | 0.32 +     | 21.88           | 5.80E-08    | 4.36E-05 |
| adenine nucleotide transport (GO:0051503)                                        |                                                                      | 43     | 7        | 0.32 +     | 21.88           | 5.80E-08    | 3.81E-05 |
| regulation of cellular pH (GO:0030641)                                           |                                                                      | 31     | 5        | 0.23 +     | 21.68           | 5.56E-06    | 1.27E-03 |
| regulation of intracellular pH (GO:0051453)                                      |                                                                      | 31     | 5        | 0.23 +     | 21.68           | 5.56E-06    | 1.22E-03 |
| purine nucleotide transport (GO:0015865)                                         |                                                                      | 44     | 7        | 0.33 +     | 21.39           | 6.69E-08    | 3.91E-05 |
| regulation of pH (GO:0006885)                                                    |                                                                      | 32     | 5        | 0.24 +     | 21              | 6.39E-06    | 1.34E-03 |
| late endosome to vacuole transport (GO:0045324)                                  |                                                                      | 64     | 10       | 0.48 +     | 21              | 8.47E-11    | 4.45E-07 |
| nucleotide transport (GO:0006862)                                                |                                                                      | 47     | 7        | 0.35 +     | 20.02           | 1.01E-07    | 5.29E-05 |
| aromatic amino acid family metabolic process (GO:0009072)                        |                                                                      | 37     | 5        | 0.28 +     | 18.17           | 1.21E-05    | 2.28E-03 |
| cellular monovalent inorganic cation homeostasis (GO:0030004)                    |                                                                      | 40     | 5        | 0.3 +      | 16.8            | 1.71E-05    | 2.91E-03 |
| endosome transport via multivesicular body sorting pathway (GO:0032509)          |                                                                      | 58     | 7        | 0.43 +     | 16.22           | 3.72E-07    | 1.78E-04 |
| multivesicular body sorting pathway (GO:0071985)                                 |                                                                      | 58     | 7        | 0.43 +     | 16.22           | 3.72E-07    | 1.63E-04 |
| monovalent inorganic cation homeostasis (GO:0055067)                             |                                                                      | 42     | 5        | 0.31 +     | 16              | 2.13E-05    | 3.39E-03 |
| carbohydrate derivative transport (GO:1901264)                                   |                                                                      | 59     | 7        | 0.44 +     | 15.95           | 4.14E-07    | 1.68E-04 |
| late endosome to vacuole transport via multivesicular body sorting pathway (GO   |                                                                      | 52     | 5        | 0.39 +     | 12.93           | 5.50E-05    | 8.26E-03 |
| organophosphate ester transport (GO:0015748)                                     |                                                                      | 79     | 7        | 0.59 +     | 11.91           | 2.56E-06    | 7.92E-04 |
| endomembrane system organization (GO:0010256)                                    |                                                                      | 96     | 7        | 0.71 +     | 9.8             | 8.60E-06    | 1.74E-03 |
| endosomal transport (GO:0016197)                                                 |                                                                      | 117    | 8        | 0.87 +     | 9.19            | 2.86E-06    | 8.34E-04 |
| vesicle organization (GO:0016050)                                                |                                                                      | 91     | 6        | 0.68 +     | 8.86            | 6.87E-05    | 1.00E-02 |
| macroautophagy (GO:0016236)                                                      |                                                                      | 105    | 6        | 0.78 +     | 7.68            | 1.46E-04    | 1.91E-02 |
| vacuolar transport (GO:0007034)                                                  |                                                                      | 184    | 10       | 1.37 +     | 7.31            | 1.02E-06    | 3.85E-04 |
| organic acid biosynthetic process (GO:0016053)                                   |                                                                      | 193    | 9        | 1.44 +     | 6.27            | 1.27E-05    | 2.30E-03 |
| carboxylic acid biosynthetic process (GO:0046394)                                |                                                                      | 193    | 9        | 1.44 +     | 6.27            | 1.27E-05    | 2.23E-03 |
| organic anion transport (GO:0015711)                                             |                                                                      | 166    | 7        | 1.23 +     | 5.67            | 2.40E-04    | 3.08E-02 |
| small molecule biosynthetic process (GO:0044283)                                 |                                                                      | 336    | 12       | 2.5 +      | 4.8             | 5.16E-06    | 1.23E-03 |
| vesicle-mediated transport (GO:0016192)                                          |                                                                      | 426    | 13       | 3.17 +     | 4.1             | 1.02E-05    | 1.98E-03 |
| ion transport (GO:0006811)                                                       |                                                                      | 390    | 11       | 2.9 +      | 3.79            | 1.15E-04    | 1.59E-02 |
| organic cyclic compound biosynthetic process (GO:1901362)                        |                                                                      | 611    | 15       | 4.55 +     | 3.3             | 2.31E-05    | 3.57E-03 |
| primary metabolic process (GO:0044238)                                           |                                                                      | 3065   | 36       | 22.8 +     | 1.58            | 6.91E-05    | 9.82E-03 |
| cellular metabolic process (GO:0044237)                                          |                                                                      | 3298   | 37       | 24.53 +    | 1.51            | 1.32E-04    | 1.78E-02 |
| organic substance metabolic process (GO:0071704)                                 |                                                                      | 3254   | 36       | 24.21 +    | 1.49            | 4.25E-04    | 4.96E-02 |
| cellular process (GO:0009987)                                                    |                                                                      | 5030   | 45       | 37.42 +    | 1.2             | 4.23E-04    | 5.06E-02 |

**Supplementary Table 1. Summary of GO enrichment analysis results**



| Phenotype Name                       | Phenotype ID | % of genes with | t% of genes with the term | Fisher's Exact Test | P-value     | BH FDR corrected P-value | Bonferroni corrected P-value |
|--------------------------------------|--------------|-----------------|---------------------------|---------------------|-------------|--------------------------|------------------------------|
| ■ development                        | APO:000023   | 78.72% (37/47)  | 49.88% (3071/6157)        |                     | 0.0000303   | 0.0004956                | 0.00055818                   |
| └ lifespan                           | APO:000030   | 57.45% (27/47)  | 25.5% (1570/6157)         |                     | 0.000004522 | 0.0001306                | 0.000117572                  |
| └└ chronological lifespan            | APO:0000316  | 53.19% (25/47)  | 19.96% (1229/6157)        |                     | 5.081E-07   | 0.00003136               | 1.87997E-05                  |
| └└└ replicative lifespan             | APO:0000317  | 23.4% (11/47)   | 7.76% (478/6157)          |                     | 0.0008334   | 0.002                    | 0.0308358                    |
| └ sexual cycle                       | APO:0000031  | 44.68% (21/47)  | 19.78% (1218/6157)        |                     | 0.001293    | 0.0003362                | 0.0033618                    |
| └└ sporulation                       | APO:0000041  | 42.55% (20/47)  | 16.49% (1015/6157)        |                     | 0.0002422   | 0.000089614              | 0.000089614                  |
| └└└ sporulation efficiency           | APO:0000044  | 25.53% (12/47)  | 6.74% (415/6157)          |                     | 0.00005523  | 0.0001305                | 0.00143598                   |
| └ budding                            | APO:0000024  | 19.15% (9/47)   | 6.45% (397/6157)          |                     | 0.003       | 0.006                    | 0.078                        |
| └└ budding pattern                   | APO:0000200  | 17.02% (8/47)   | 2.94% (181/6157)          |                     | 0.0007258   | 0.0002066                | 0.00268546                   |
| ■ metabolism and growth              | APO:0000094  | 100.0% (47/47)  | 81.65% (5027/6157)        |                     | 0.001652    | 0.0004956                | 0.0009912                    |
| └ protein/peptide distribution       | APO:0000209  | 51.06% (24/47)  | 13.11% (807/6157)         |                     | 6.181E-10   | 1.60706E-08              | 1.60706E-08                  |
| └ vegetative growth                  | APO:0000106  | 89.36% (42/47)  | 50.64% (3118/6157)        |                     | 2.747E-08   | 2.381E-07                | 7.1422E-07                   |
| └ nutrient utilization               | APO:0000096  | 82.98% (39/47)  | 43.07% (2652/6157)        |                     | 4.264E-08   | 2.772E-07                | 1.10864E-06                  |
| └└ utilization of carbon source      | APO:0000098  | 74.47% (35/47)  | 27.04% (1665/6157)        |                     | 2.209E-11   | 3.348E-10                | 8.1733E-10                   |
| └└└ respiratory metabolism           | APO:0000102  | 65.96% (31/47)  | 19.94% (1228/6157)        |                     | 1.229E-11   | 4.565E-11                | 3.1954E-10                   |
| └└└ respiratory growth               | APO:0000309  | 61.7% (29/47)   | 18.26% (1124/6157)        |                     | 6.732E-11   | 2.35E-10                 | 4.7124E-10                   |
| └└ auxotrophy                        | APO:0000097  | 46.81% (22/47)  | 9.11% (561/6157)          |                     | 2.715E-11   | 3.348E-10                | 1.00455E-09                  |
| └└ utilization of nitrogen source    | APO:0000099  | 46.81% (22/47)  | 21.68% (1335/6157)        |                     | 0.0001328   | 0.000351                 | 0.0049136                    |
| └└ utilization of iron source        | APO:0000157  | 6.38% (3/47)    | 0.58% (36/6157)           |                     | 0.003       | 0.005                    | 0.111                        |
| └ chemical compound accumulation     | APO:0000095  | 78.72% (37/47)  | 41.74% (2570/6157)        |                     | 3.361E-07   | 0.00001748               | 8.7386E-06                   |
| └ chemical compound excretion        | APO:0000222  | 34.04% (16/47)  | 8.07% (497/6157)          |                     | 5.085E-07   | 0.0000013221             | 0.000013221                  |
| └ protein/peptide modification       | APO:0000131  | 34.04% (16/47)  | 8.87% (546/6157)          |                     | 0.000001743 | 0.000005665              | 0.000045318                  |
| └ protein/peptide accumulation       | APO:0000149  | 36.17% (17/47)  | 15.53% (956/6157)         |                     | 0.0007856   | 0.002                    | 0.0204256                    |
| └ RNA accumulation                   | APO:0000224  | 21.28% (10/47)  | 7.78% (479/6157)          |                     | 0.003       | 0.006                    | 0.078                        |
| ■ morphology                         | APO:0000049  | 80.85% (38/47)  | 64.17% (3951/6157)        |                     | 0.021       | 0.042                    | 0.126                        |
| └ cellular morphology                | APO:0000050  | 76.6% (36/47)   | 56.64% (3476/6157)        |                     | 0.005       | 0.009                    | 0.13                         |
| └ cell shape                         | APO:0000051  | 14.89% (7/47)   | 2.6% (160/6157)           |                     | 0.0002291   | 0.0005298                | 0.0004767                    |
| └ subcellular morphology             | APO:0000226  | 72.34% (34/47)  | 51.53% (3173/6157)        |                     | 0.005       | 0.008                    | 0.185                        |
| └└ lipid particle morphology         | APO:0000242  | 14.89% (7/47)   | 2.86% (176/6157)          |                     | 0.0004013   | 0.0008026                | 0.0104338                    |
| └└└ endomembrane system morphology   | APO:0000303  | 68.09% (32/47)  | 45.18% (2782/6157)        |                     | 0.002       | 0.004                    | 0.052                        |
| └└└ vacuolar morphology              | APO:0000059  | 68.09% (32/47)  | 42.63% (2625/6157)        |                     | 0.0005526   | 0.001                    | 0.0036862                    |
| └ cell size                          | APO:0000052  | 19.15% (9/47)   | 9.79% (603/6157)          |                     | 0.045       | 0.067                    | 1                            |
| └ culture appearance                 | APO:0000158  | 31.91% (15/47)  | 20.09% (1237/6157)        |                     | 0.065       | 0.099                    | 1                            |
| └ biofilm formation                  | APO:0000159  | 25.53% (12/47)  | 7.84% (483/6157)          |                     | 0.0002286   | 0.0005286                | 0.0004582                    |
| ■ cellular processes                 | APO:0000066  | 100.0% (47/47)  | 94.1% (5794/6157)         |                     | 0.113       | 0.17                     | 0.678                        |
| └ intracellular transport            | APO:0000073  | 53.19% (25/47)  | 17.04% (1049/6157)        |                     | 2.132E-08   | 2.381E-07                | 5.5432E-07                   |
| └ endocytosis                        | APO:0000075  | 34.04% (16/47)  | 7.13% (439/6157)          |                     | 9.69E-08    | 7.171E-07                | 3.5853E-06                   |
| └ protein transport                  | APO:0000129  | 29.79% (14/47)  | 6.74% (415/6157)          |                     | 0.00001907  | 0.00001008               | 0.000070559                  |
| └└ vacuolar transport                | APO:0000079  | 23.4% (11/47)   | 1.06% (65/6157)           |                     | 5.41E-12    | 2.344E-11                | 1.4065E-10                   |
| └└ protein secretion                 | APO:0000078  | 10.64% (5/47)   | 2.27% (140/6157)          |                     | 0.005       | 0.009                    | 0.13                         |
| └ autophagy                          | APO:0000074  | 19.15% (9/47)   | 3.77% (232/6157)          |                     | 0.00006487  | 0.0002                   | 0.00240019                   |
| └ mitophagy                          | APO:0000240  | 14.89% (7/47)   | 2.55% (157/6157)          |                     | 0.0002048   | 0.0004437                | 0.0053248                    |
| └ chromosome/plasmid maintenance     | APO:0000143  | 63.83% (30/47)  | 27.97% (1722/6157)        |                     | 5.282E-07   | 0.000001962              | 1.37332E-05                  |
| └ telomere length                    | APO:0000144  | 36.17% (17/47)  | 5.7% (351/6157)           |                     | 5.145E-10   | 4.759E-09                | 1.90365E-08                  |
| └ transposable element transposition | APO:0000047  | 23.4% (11/47)   | 7.42% (457/6157)          |                     | 0.0005755   | 0.001                    | 0.0212935                    |
| └ stress resistance                  | APO:0000080  | 100.0% (47/47)  | 91.9% (5658/6157)         |                     | 0.03        | 0.052                    | 0.78                         |
| └ temperature sensitive growth       | APO:0000092  | 80.85% (38/47)  | 30.13% (1855/6157)        |                     | 1.192E-12   | 4.41E-11                 | 4.4104E-11                   |
| └ heat sensitivity                   | APO:0000147  | 80.85% (38/47)  | 28.75% (1770/6157)        |                     | 2.421E-13   | 1.574E-12                | 6.2946E-12                   |
| └ toxin resistance                   | APO:0000215  | 57.45% (27/47)  | 25.55% (1573/6157)        |                     | 0.000004646 | 0.00002149               | 0.000171902                  |
| └ killer toxin resistance            | APO:0000081  | 19.15% (9/47)   | 9.24% (569/6157)          |                     | 0.037       | 0.057                    | 0.962                        |
| └ resistance to enzymatic treatment  | APO:0000193  | 25.53% (12/47)  | 5.73% (353/6157)          |                     | 0.00001148  | 0.00004276               | 0.00042476                   |
| └ thermotolerance                    | APO:0000093  | 40.43% (19/47)  | 16.05% (988/6157)         |                     | 0.00006129  | 0.0002                   | 0.00226773                   |
| └└ innate thermotolerance            | APO:0000334  | 40.43% (19/47)  | 15.67% (965/6157)         |                     | 0.00004414  | 0.0001148                | 0.00114764                   |
| └ freeze-thaw resistance             | APO:0000241  | 10.64% (5/47)   | 1.25% (77/6157)           |                     | 0.0003541   | 0.0007707                | 0.0131017                    |
| └ desiccation resistance             | APO:0000326  | 36.17% (17/47)  | 16.0% (985/6157)          |                     | 0.000908    | 0.002                    | 0.033596                     |
| └ radiation resistance               | APO:0000084  | 19.15% (9/47)   | 6.33% (390/6157)          |                     | 0.003       | 0.005                    | 0.111                        |
| └ UV resistance                      | APO:0000085  | 14.89% (7/47)   | 5.64% (347/6157)          |                     | 0.016       | 0.026                    | 0.416                        |
| └ resistance to chemicals            | APO:0000087  | 100.0% (47/47)  | 87.07% (5361/6157)        |                     | 0.003       | 0.005                    | 0.111                        |
| └ alkaline pH resistance             | APO:0000202  | 42.55% (20/47)  | 2.6% (160/6157)           |                     | 3.062E-19   | 7.961E-18                | 7.9612E-18                   |
| └ metal resistance                   | APO:0000090  | 61.7% (29/47)   | 12.05% (742/6157)         |                     | 1.692E-15   | 2.2E-14                  | 4.3992E-14                   |
| └ ionic stress resistance            | APO:0000205  | 34.04% (16/47)  | 2.66% (164/6157)          |                     | 8.88E-14    | 7.696E-13                | 2.3088E-12                   |
| └ acid pH resistance                 | APO:0000201  | 42.55% (20/47)  | 6.4% (394/6157)           |                     | 3.572E-12   | 1.857E-11                | 9.2872E-11                   |
| └ osmotic stress resistance          | APO:0000082  | 42.55% (20/47)  | 7.71% (475/6157)          |                     | 9.6E-11     | 3.12E-10                 | 2.496E-09                    |
| └ hyperosmotic stress resistance     | APO:0000204  | 42.55% (20/47)  | 7.28% (448/6157)          |                     | 3.448E-11   | 2.356E-10                | 2.4136E-10                   |
| └ oxidative stress resistance        | APO:0000083  | 46.81% (22/47)  | 18.55% (1142/6157)        |                     | 0.0001025   | 0.00002961               | 0.0002665                    |

Supplementary Table 2. Summary of *modPhEA* analysis results

The genes and gene functions associated with “replicative lifespan” are highlighted in blue.

| Gene          | Systematic Name | Function                                  |
|---------------|-----------------|-------------------------------------------|
| <i>DIS4</i>   | YKL002W         | ESCRT                                     |
| <i>SNF7</i>   | YLR025W         |                                           |
| <i>STP22</i>  | YCL008C         |                                           |
| <i>VPS20</i>  | YMR077C         |                                           |
| <i>VPS24</i>  | YKL041W         |                                           |
| <i>VPS25</i>  | YJR102C         |                                           |
| <i>VPS36</i>  | YLR417W         |                                           |
| <i>VPS4</i>   | YPR173C         |                                           |
| <i>VMA1</i>   | YDL185W         | V-ATPase                                  |
| <i>VMA13</i>  | YPR036W         |                                           |
| <i>VMA21</i>  | YGR105W         |                                           |
| <i>VMA5</i>   | YKL080W         |                                           |
| <i>VMA9</i>   | YCL005W-A       |                                           |
| <i>VPH2</i>   | YKL119C         |                                           |
| <i>AAT2</i>   | YLR027C         | Amino acid biosynthesis/sensor/metabolism |
| <i>ARO1</i>   | YDR127W         |                                           |
| <i>ARO2</i>   | YGL148W         |                                           |
| <i>ARO7</i>   | YPR060C         |                                           |
| <i>TRP4</i>   | YDR354W         |                                           |
| <i>TRP5</i>   | YGL026C         |                                           |
| <i>DEF1</i>   | YKL054C         | DNA replication/damage/repair             |
| <i>FYV6</i>   | YNL133C         |                                           |
| <i>RFA2</i>   | YNL312W         |                                           |
| <i>SEN1</i>   | YLR430W         |                                           |
| <i>ACB1</i>   | YGR037C         | Lipid                                     |
| <i>CHO1</i>   | YER026C         |                                           |
| <i>ERG2</i>   | YMR202W         |                                           |
| <i>ERG3</i>   | YLR056W         |                                           |
| <i>RPB3</i>   | YIL021W         | RNA helicase/polymerase                   |
| <i>PRP22</i>  | YER013W         |                                           |
| <i>PRP43</i>  | YGL120C         |                                           |
| <i>ISA1</i>   | YLL027W         | Mitochondria                              |
| <i>ISA2</i>   | YPR067W         |                                           |
| <i>MRPL51</i> | YPR100w         |                                           |
| <i>VPS16</i>  | YPL045W         | SNARE/HOPS                                |
| <i>PEP3</i>   | YLR148W         |                                           |
| <i>SGD1</i>   | YLR336C         | Ribosome                                  |
| <i>UTP5</i>   | YDR398W         |                                           |
| <i>PHO85</i>  | YPL031C         | CDK                                       |
| <i>GAS1</i>   | YMR307W         | Cell wall                                 |
| <i>STH1</i>   | YIL126W         | Chromatin remodeling                      |
| <i>SWA2</i>   | YDR320C         | Endocytosis/Exocytosis                    |
| <i>VPS34</i>  | YLR240W         | PI3-kinase                                |
| <i>TPD3</i>   | YAL016W         | PP2A                                      |
| <i>PTC1</i>   | YDL006W         | PP2C                                      |
| <i>ARF1</i>   | YDL192W         | Ras GTPase                                |
| <i>CCR4</i>   | YAL021C         | Transcription                             |
| <i>KCS1</i>   | YDR017C         | Inositol/Vacuole                          |

**Supplementary Table 3. 18 out of 48 screening hits are reported to have altered replicative lifespan**

Supplementary Table 4. SASP factors identified in the significant genes expressed in PMD-Sen, Ca<sup>2+</sup>-Sen, and DDR-Sen

Supplementary Table 5. Overlapped pathways between cutaneous wound and PMD-Sen/DDR-Sen in the significantly differentially regulated pathways

Supplementary Table 6. Overlapped pathways between cutaneous wound and PMD-Sen/DDR-Sen in the top 146 pathways regardless of its z-score

Supplementary Table 7. Yeast strains used in this study

Supplementary Table 8. Antibodies used in this study

Supplementary Table 9. Primer sequences used for qPCR analyses

\*Supplementary Table 4-9 were provided in the .xlsx format.
